# Supplementary material for: State-level economic uncertainty and cardiovascular disease deaths: evidence from the United States
Source: Springer Nature journal article supplement (doi:10.1007/s10654-023-01076-3), 2023-11-01
Supplement: MOESM1 [file 26307708]

**State-level economic uncertainty and cardiovascular deaths:  
evidence from the United States**

**Online Supplement**

---

**eTable 1: Summary statistics**

| <b>Variable</b>                 | <b>Observations</b> | <b>Mean</b> | <b>Standard<br/>Deviation</b> |
|---------------------------------|---------------------|-------------|-------------------------------|
| <b>Total deaths</b>             | 6,120               | 1322.5      | 1396.6                        |
| <b>Female deaths</b>            | 6,120               | 662.0       | 700.7                         |
| <b>Male deaths</b>              | 6,120               | 660.5       | 698.3                         |
| <b>EPU-N</b>                    | 6,120               | 106.0       | 65.7                          |
| <b>EPU-S</b>                    | 6,120               | 75.8        | 53.5                          |
| <b>Unemployment</b>             | 6,120               | 6.5         | 2.2                           |
| <b>GDP growth</b>               | 6,120               | 1.4         | 5.2                           |
| <b>Population<br/>(million)</b> | 6,120               | 6.2         | 6.9                           |
| <b>CPI</b>                      | 6,120               | 229.4       | 10.4                          |
| <b>Poverty rate</b>             | 6,120               | 13.5        | 3.4                           |

**eTable 2: Lags of economic uncertainty and cardiovascular deaths, by gender**

| <b>Panel A: Females</b> |                       |                      |                    |                      |                     |
|-------------------------|-----------------------|----------------------|--------------------|----------------------|---------------------|
|                         | (1)                   | (2)                  | (3)                | (4)                  | (5)                 |
|                         | Female                | Female               | Female             | Female               | Female              |
|                         | Poisson               | Poisson              | Poisson            | Poisson              | Poisson             |
|                         | 1-month               | 2-month              | 3-month            | 4-month              | 5-month             |
| Lagged EPU-N            | 0.0041***<br>(0.0014) | 0.0029**<br>(0.0012) | 0.0016<br>(0.0012) | -0.0021<br>(0.0015)  | -0.0009<br>(0.0012) |
| Lagged EPU-S            | -0.0005<br>(0.0015)   | 0.0021<br>(0.0015)   | 0.0013<br>(0.0012) | 0.0025**<br>(0.0012) | 0.0017<br>(0.0013)  |
| Controls                | Yes                   | Yes                  | Yes                | Yes                  | Yes                 |
| Month FE                | Yes                   | Yes                  | Yes                | Yes                  | Yes                 |
| Year FE                 | Yes                   | Yes                  | Yes                | Yes                  | Yes                 |
| Observations            | 6,069                 | 6,018                | 5,967              | 5,916                | 5,865               |
| Number of States        | 51                    | 51                   | 51                 | 51                   | 51                  |

| <b>Panel A: Males</b> |                      |                      |                    |                     |                     |
|-----------------------|----------------------|----------------------|--------------------|---------------------|---------------------|
|                       | (1)                  | (2)                  | (3)                | (4)                 | (5)                 |
|                       | Male                 | Male                 | Male               | Male                | Male                |
|                       | Poisson              | Poisson              | Poisson            | Poisson             | Poisson             |
|                       | 1-month              | 2-month              | 3-month            | 4-month             | 5-month             |
| Lagged EPU-N          | 0.0030**<br>(0.0012) | 0.0024**<br>(0.0012) | 0.0018<br>(0.0011) | -0.0016<br>(0.0013) | -0.0011<br>(0.0014) |
| Lagged EPU-S          | -0.0002<br>(0.0014)  | 0.0016<br>(0.0016)   | 0.0010<br>(0.0013) | 0.0016<br>(0.0013)  | 0.0019<br>(0.0012)  |
| Controls              | Yes                  | Yes                  | Yes                | Yes                 | Yes                 |
| Month FE              | Yes                  | Yes                  | Yes                | Yes                 | Yes                 |
| Year FE               | Yes                  | Yes                  | Yes                | Yes                 | Yes                 |
| Observations          | 6,069                | 6,018                | 5,967              | 5,916               | 5,865               |
| Number of States      | 51                   | 51                   | 51                 | 51                  | 51                  |

Note: Controls include unemployment, GDP growth and population, CPI, and poverty rate. EPU-N: economic policy uncertainty index arising from national/international sources; EPU-S: economic policy uncertainty index arising from state/local sources; FE: fixed effects. Regression coefficients and standard errors (in parentheses) are reported.

\*p<0.10, \*\*p<0.05, \*\*\*p<0.01.

**eTable 3: Lags of economic uncertainty and cardiovascular deaths, additional analysis**

|                     | (1)                    | (2)                    | (3)                    |
|---------------------|------------------------|------------------------|------------------------|
|                     | Total                  | Female                 | Male                   |
|                     | Poisson                | Poisson                | Poisson                |
| EPU-N (Lag-1 month) | 0.0031***<br>(0.0009)  | 0.0039***<br>(0.0011)  | 0.0023**<br>(0.0010)   |
| EPU-N (Lag-2 month) | 0.0013<br>(0.0009)     | 0.0014<br>(0.0010)     | 0.0012<br>(0.0011)     |
| EPU-N (Lag-3 month) | 0.0012*<br>(0.0007)    | 0.0008<br>(0.0010)     | 0.0016*<br>(0.0009)    |
| EPU-N (Lag-4 month) | -0.0033***<br>(0.0010) | -0.0037***<br>(0.0013) | -0.0029***<br>(0.0011) |
| EPU-N (Lag-5 month) | -0.0009<br>(0.0010)    | -0.0008<br>(0.0010)    | -0.0010<br>(0.0012)    |
| EPU-S (Lag-1 month) | -0.0007<br>(0.0008)    | -0.0009<br>(0.0011)    | -0.0005<br>(0.0010)    |
| EPU-S (Lag-2 month) | 0.0016*<br>(0.0010)    | 0.0020*<br>(0.0012)    | 0.0012<br>(0.0011)     |
| EPU-S (Lag-3 month) | 0.0003<br>(0.0009)     | 0.0005<br>(0.0010)     | 0.0001<br>(0.0010)     |
| EPU-S (Lag-4 month) | 0.0015*<br>(0.0009)    | 0.0020*<br>(0.0010)    | 0.0010<br>(0.0010)     |
| EPU-S (Lag-5 month) | 0.0016                 | 0.0014                 | 0.0018                 |
| Controls            | Yes                    | Yes                    | Yes                    |
| Month FE            | Yes                    | Yes                    | Yes                    |
| Year FE             | Yes                    | Yes                    | Yes                    |
| Observations        | 5,865                  | 5,865                  | 5,865                  |
| Number of StateCode | 51                     | 51                     | 51                     |

Note: Controls include unemployment, GDP growth and population, CPI, and poverty rate. GDP: Gross Domestic Product; CPI: Consumer Price Index; EPU-N: economic policy uncertainty index arising from national/international sources; EPU-S: economic policy uncertainty index arising from state/local source; FE: fixed effects. Regression coefficients and standard errors (in parentheses) are reported.

\*p<0.10, \*\*p<0.05, \*\*\*p<0.01.

**eTable 4: Economic uncertainty and cardiovascular deaths (controlling for time trends)**

|                      | (1)                   | (2)                   | (3)                    | (4)                    |
|----------------------|-----------------------|-----------------------|------------------------|------------------------|
|                      | Total                 | Total                 | Total                  | Total                  |
|                      | Poisson               | Poisson               | Poisson                | Poisson                |
| EPU-N                | 0.0046***<br>(0.0017) | 0.0037***<br>(0.0011) | 0.0052***<br>(0.0018)  | 0.0036***<br>(0.0011)  |
| EPU-S                | -0.0015<br>(0.0022)   | 0.0006<br>(0.0012)    | -0.0016<br>(0.0022)    | -0.0002<br>(0.0013)    |
| Time trend           | 0.0019***<br>(0.0005) | 0.0011***<br>(0.0002) | -0.0251***<br>(0.0076) | -0.0104***<br>(0.0025) |
| Quadratic time trend |                       |                       | 0.0000***<br>(0.0000)  | 0.0000***<br>(0.0000)  |
| Controls             | Yes                   | Yes                   | Yes                    | Yes                    |
| Month FE             | No                    | Yes                   | No                     | Yes                    |
| Year FE              | Yes                   | No                    | Yes                    | No                     |
| Observations         | 6,120                 | 6,120                 | 6,120                  | 6,120                  |
| Number of StateCode  | 51                    | 51                    | 51                     | 51                     |

Note: Controls include unemployment, GDP growth and population, CPI, and poverty rate. GDP: Gross Domestic Product; CPI: Consumer Price Index; EPU-N: economic policy uncertainty index arising from national/international sources; EPU-S: economic policy uncertainty index arising from state/local sources; FE: fixed effects. Regression coefficients and standard errors (in parentheses) are reported.

\*p<0.10, \*\*p<0.05, \*\*\*p<0.01.

**eTable 5: Economic uncertainty and cardiovascular deaths (fixed and random effects models)**

|                     | (1)                   | (2)                   | (3)                   | (4)                   |
|---------------------|-----------------------|-----------------------|-----------------------|-----------------------|
|                     | Total                 | Total                 | Total                 | Total                 |
|                     | Fixed Effects         | Fixed Effects         | Random Effects        | Random Effects        |
| EPU-N               | 0.0040***<br>(0.0012) | 0.0039***<br>(0.0012) | 0.0040***<br>(0.0012) | 0.0039***<br>(0.0012) |
| EPU-S               | 0.0003<br>(0.0014)    | -0.0001<br>(0.0015)   | 0.0004<br>(0.0014)    | 0.0000<br>(0.0015)    |
| Main controls       | Yes                   | Yes                   | Yes                   | Yes                   |
| Additional controls | No                    | Yes                   | No                    | Yes                   |
| Month FE            | Yes                   | Yes                   | Yes                   | Yes                   |
| Year FE             | Yes                   | Yes                   | Yes                   | Yes                   |
| Observations        | 6,120                 | 6,120                 | 6,120                 | 6,120                 |
| R-squared           | 0.5867                | 0.5875                |                       |                       |
| Number of States    | 51                    | 51                    | 51                    | 51                    |

Note: Main controls include unemployment, GDP growth and population. Additional controls also include CPI and poverty rate. GDP: Gross Domestic Product; CPI: Consumer Price Index; EPU-N: economic policy uncertainty index arising from national/international sources; EPU-S: economic policy uncertainty index arising from state/local sources; FE: fixed effects. Regression coefficients and standard errors (in parentheses) are reported.

\*p<0.10, \*\*p<0.05, \*\*\*p<0.01.

**eTable 6: Economic uncertainty and cardiovascular deaths (other specifications)**

|                  | (1)                  | (2)                   | (4)                   | (5)                   |
|------------------|----------------------|-----------------------|-----------------------|-----------------------|
|                  | Total                | Total                 | Total                 | Total                 |
|                  | Poisson              | Negative Binomial     | Fixed Effects         | Random Effects        |
| Log EPU-N        | 0.0044**<br>(0.0021) | 0.0048***<br>(0.0012) | 0.0049***<br>(0.0014) | 0.0049***<br>(0.0014) |
| Log EPU-S        | 0.0011<br>(0.0022)   | 0.0003<br>(0.0012)    | -0.0001<br>(0.0022)   | -0.0000<br>(0.0022)   |
| Controls         | Yes                  | Yes                   | Yes                   | Yes                   |
| Month FE         | Yes                  | Yes                   | Yes                   | Yes                   |
| Year FE          | Yes                  | Yes                   | Yes                   | Yes                   |
| Observations     | 6,120                | 6,120                 | 6,120                 | 6,120                 |
| Number of States | 51                   | 51                    | 51                    | 51                    |
| R-squared        |                      |                       | 0.5872                |                       |

Note: Controls include unemployment, GDP growth and population, CPI, and poverty rate. In Model 4, we have controlled for the natural logarithm of EPU indices, instead of standardising by the standard deviation. GDP: Gross Domestic Product; CPI: Consumer Price Index; EPU-N: economic policy uncertainty index arising from national/international sources; EPU-S: economic policy uncertainty index arising from state/local source; FE: fixed effects. Regression coefficients and standard errors (in parentheses) are reported.

\*p<0.10, \*\*p<0.05, \*\*\*p<0.01.

**eTable 7: Economic uncertainty and deaths (placebo outcomes)**

|                  | (1)                | (2)                 |
|------------------|--------------------|---------------------|
|                  | C00-D48            | M00-M99             |
|                  | Poisson            | Poisson             |
| EPU-N            | 0.0004<br>(0.0008) | 0.0007<br>(0.0048)  |
| EPU-S            | 0.0002<br>(0.0007) | -0.0018<br>(0.0138) |
| Controls         | Yes                | Yes                 |
| Month FE         | Yes                | Yes                 |
| Year YE          | Yes                | Yes                 |
| Observations     | 6,120              | 6,120               |
| Number of States | 51                 | 51                  |

Note: Controls include unemployment, GDP growth and population, CPI, and poverty rate. GDP: Gross Domestic Product; CPI: Consumer Price Index; EPU-N: economic policy uncertainty index arising from national/international sources; EPU-S: economic policy uncertainty index arising from state/local sources; FE: fixed effects. Regression coefficients and standard errors (in parentheses) are reported.

\*p<0.10, \*\*p<0.05, \*\*\*p<0.01.

**eTable 8: Economic uncertainty, avoidable and non-avoidable deaths**

|                  | (1)                     | (2)                 |
|------------------|-------------------------|---------------------|
|                  | Non-avoidable<br>causes | Avoidable<br>causes |
|                  | Poisson                 | Poisson             |
| EPU-N            | 0.0043***<br>(0.0011)   | 0.0010<br>(0.0016)  |
| EPU-S            | -0.0004<br>(0.0012)     | 0.0009<br>(0.0017)  |
| Controls         | Yes                     | Yes                 |
| Month FE         | Yes                     | Yes                 |
| Year YE          | Yes                     | Yes                 |
| Observations     | 6,120                   | 6,120               |
| Number of States | 51                      | 51                  |

Note: Controls include unemployment, GDP growth and population, CPI, and poverty rate. GDP: Gross Domestic Product; CPI: Consumer Price Index; EPU-N: economic policy uncertainty index arising from national/international sources; EPU-S: economic policy uncertainty index arising from state/local sources; FE: fixed effects. Regression coefficients and standard errors (in parentheses) are reported.

\*p<0.10, \*\*p<0.05, \*\*\*p<0.01.



**eTable 9: Economic uncertainty, avoidable and non-avoidable deaths**

|                  | (1)                      | (2)                      | (3)                       | (4)                       |
|------------------|--------------------------|--------------------------|---------------------------|---------------------------|
|                  | Excl. 1% wrt<br>to EPU-N | Excl. 5% wrt<br>to EPU-N | Excl. 1% wrt<br>to deaths | Excl. 5% wrt<br>to deaths |
|                  | Poisson                  | Poisson                  | Poisson                   | Poisson                   |
| EPU-N            | 0.0036***<br>(0.0011)    | 0.0043***<br>(0.0012)    | 0.0031***<br>(0.0010)     | 0.0026**<br>(0.0011)      |
| EPU-S            | 0.0001<br>(0.0013)       | 0.0000<br>(0.0012)       | 0.0003<br>(0.0013)        | -0.0006<br>(0.0010)       |
| Controls         | Yes                      | Yes                      | Yes                       | Yes                       |
| Month FE         | Yes                      | Yes                      | Yes                       | Yes                       |
| Year FE          | Yes                      | Yes                      | Yes                       | Yes                       |
| Observations     | 5,997                    | 5,508                    | 6,005                     | 5,516                     |
| Number of States | 51                       | 51                       | 51                        | 49                        |

Note: Controls include unemployment, GDP growth and population, CPI, and poverty rate. GDP: Gross Domestic Product; CPI: Consumer Price Index; EPU-N: economic policy uncertainty index arising from national/international sources; EPU-S: economic policy uncertainty index arising from state/local sources; FE: fixed effects. Regression coefficients and standard errors (in parentheses) are reported. In Column 1 we trim the bottom and top 1% of observations with the lowest and highest values of economic uncertainty. In Column 2, we repeat the same exercise, excluding the bottom and top 5%. In Column 3 (4), we trim the bottom and top 1% (5%) of observations with the lowest and highest values of cardiovascular disease deaths.

\*p<0.10, \*\*p<0.05, \*\*\*p<0.01.

eFigure 1: Differences in mortality rates across different EPU quintiles

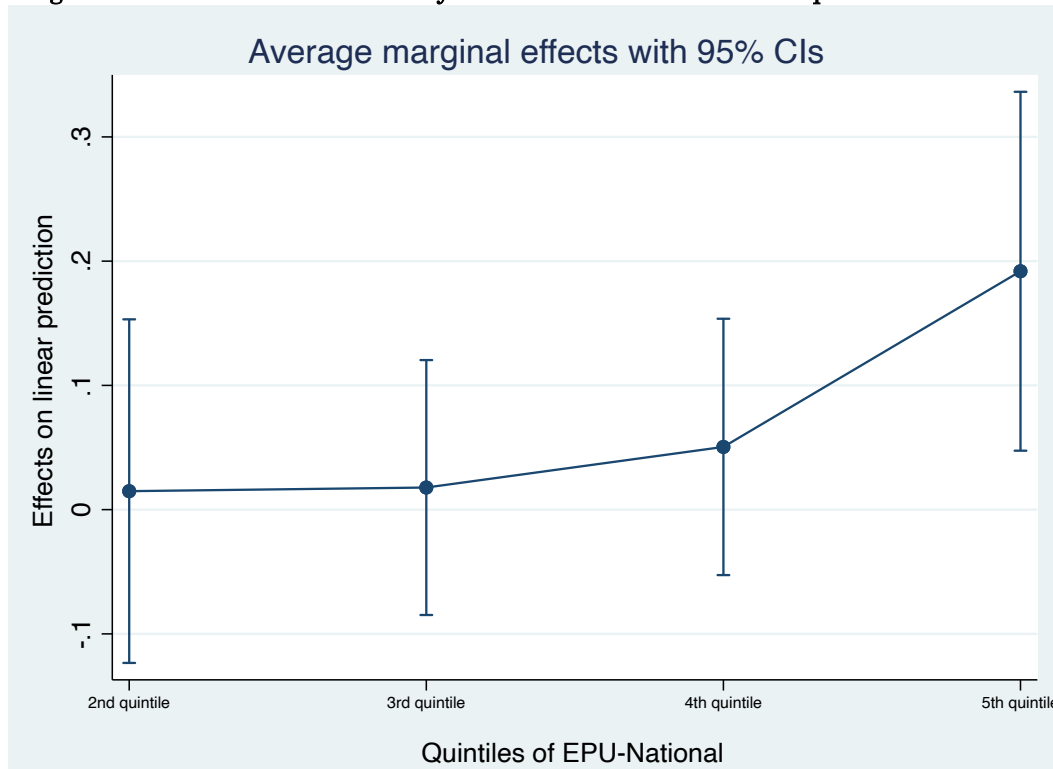

Notes: Estimates of the difference in mortality rate between each quintile of economic uncertainty relative to the first quintile (lower levels of economic uncertainty).
